# Supplementary material for: Morphological and Genetics Support for a Hitherto Undescribed Spotted Cat Species (Genus Leopardus; Felidae, Carnivora) from the Southern Colombian Andes
Source: MDPI journal article supplement (doi:10.3390/genes14061266), 2023-06-15
Supplement: s1 [file s1]

**Table S1.** Tigrina-like specimens and other *Leopardus* individuals analyzed for two different mitochondrial data sets (1- mtND5; 2- mitogenomes, **including mtCyt-b gene**). **mt** = mitochondrial. PUJ = Mammal collection of the Laboratory of Molecular Population Genetics and Evolutionary Biology at the Pontificia Universidad Javeriana (Bogotá, Colombia). IvH = Mammal collection of the Instituto von Humboldt (Villa de Leyva, Colombia).

| <b>Taxon</b>                                                   | <b>Country</b> | <b>Precise origin of each specimen</b> | <b>mt data set analysed and accession voucher numbers (ID)</b> | <b>References and GenBank accession numbers</b> |
|----------------------------------------------------------------|----------------|----------------------------------------|----------------------------------------------------------------|-------------------------------------------------|
| <b><i>L. tigrinus</i> and a new little spotted cat species</b> | Costa Rica     | Arenal Cordillera Volcánica Central    | 1, 2<br>PUJ ID: lti81                                          | This work<br>GenBank: MG230227.1                |
|                                                                | Costa Rica     | Guanacaste                             | 1, 2<br>PUJ ID: lti82                                          | This work<br>GenBank: MG230228.1                |
|                                                                | Venezuela      | Mesa Bolivar, Mérida                   | 1<br>PUJ ID: lti29                                             | This work<br>GenBank: MG230207.1                |
|                                                                | Colombia       | Valdivia, Antioquia                    | 1, 2<br>PUJ ID: lti68                                          | This work<br>GenBank: MG230196.1                |
|                                                                | Colombia       | Valdivia, Antioquia                    | 1<br>PUJ ID: lti38                                             | This work<br>GenBank: MG230202.1                |
|                                                                | Colombia       | Caucasia, Antioquia                    | 1, 2<br>PUJ ID: lti53                                          | This work<br>GenBank: MG230198.1                |
|                                                                | Colombia       | Caucasia, Antioquia                    | 1<br>PUJ ID: lti25                                             | This work<br>GenBank: MG230210.1                |
|                                                                | Colombia       | Sonsón, Antioquia                      | 1<br>PUJ ID: lti12                                             | This work<br>GenBank: MG230214.1                |
|                                                                | Colombia       | Barbosa, Antioquia                     | 1<br>PUJ ID: lti3                                              | This work<br>GenBank: MG230216.1                |
|                                                                | Colombia       | Nevado del Ruiz, Caldas                | 1, 2<br>PUJ ID: lti8                                           | This work<br>GenBank: MG230203.1                |
|                                                                | Colombia       | La Virginia, Risaralda                 | 1, 2<br>PUJ ID: lti53                                          | This work<br>GenBank: MG230204.1                |
|                                                                | Colombia       | Apia, Risaralda                        | 1, 2<br>PUJ ID: lti61                                          | This work<br>GenBank: MG230197.1                |
|                                                                | Colombia       | Circasia, Quindio                      | 1<br>PUJ ID: lti35                                             | This work<br>GenBank: MG230212.1                |
|                                                                | Colombia       | Tunja, Boyacá                          | 1<br>PUJ ID: lti1                                              | This work<br>GenBank: MG230218.1                |
|                                                                | Colombia       | Chita, Boyacá                          | 1, 2<br>PUJ ID: lti2                                           | This work<br>GenBank: MG230219.1                |
|                                                                | Colombia       | Coper, Boyacá                          | 1<br>PUJ ID: lti7                                              | This work<br>GenBank: MG230220.1                |
|                                                                | Colombia       | Chingaza National Park, Cundinamarca   | 1<br>PUJ ID: lti19                                             | This work<br>GenBank: MG230201.1                |
|                                                                | Colombia       | Chingaza National Park, Cundinamarca   | 1<br>PUJ ID: lti33                                             | This work<br>GenBank: MG230205.1                |
|                                                                | Colombia       | El Refugio, La Macarena, Meta          | 1<br>PUJ ID: lti14                                             | This work<br>GenBank: MG230213.1                |
|                                                                | Colombia       | Pitalito, Huila                        | 1<br>PUJ ID: lti28                                             | This work<br>GenBank: MG230208.1                |
|                                                                | Colombia       | San Agustín, Huila                     | 1<br>PUJ ID: lti30                                             | This work<br>GenBank: MG230206.1                |
|                                                                | Colombia       | La Plata, Huila                        | 1<br>PUJ ID: lti13                                             | This work<br>GenBank: MG230222.1                |
|                                                                | Colombia       | Jamundí, Valle del Cauca               | 1<br>PUJ ID: lti40                                             | This work<br>GenBank: MG230200.1                |
|                                                                | Colombia       | Ginebra, Valle del                     | 1                                                              | This work                                       |

|                     |                   |                                           |                       |                                     |
|---------------------|-------------------|-------------------------------------------|-----------------------|-------------------------------------|
|                     |                   | Cauca                                     | PUJ ID: lti9          | GenBank: MG230221.1                 |
|                     | Colombia          | Florencia, Caquetá                        | 1<br>PUJ ID: lti11    | This work<br>GenBank: MG230215.1    |
|                     | Colombia          | Galera Volcano,<br>Nariño                 | 1, 2<br>IvH ID: 5857  | This work<br>GenBank: MG230232.1    |
|                     | Ecuador           | Concepción,<br>Esmeraldas                 | 1<br>PUJ ID: lti26    | This work<br>GenBank: MG230225.1    |
|                     | Ecuador           | Intag, Imbabura                           | 1, 2<br>PUJ ID: lti42 | This work<br>GenBank: MG230224.1    |
|                     | Ecuador           | Papallacta, Napo                          | 1<br>PUJ ID: lti43    | This work<br>GenBank: MG230199.1    |
|                     | Ecuador           | Pajuli, Cotopaxi                          | 1, 2<br>PUJ ID: lti22 | This work<br>GenBank: MG230223.1    |
|                     | Peru              | Lamas, San Martín                         | 1<br>PUJ ID: lti21    | This work<br>GenBank: MG230211.1    |
|                     | Bolivia           | Cotapata National<br>Park, Yungas, La Paz | 1<br>PUJ ID: lti27    | This work<br>GenBank: MG230209.1    |
|                     | Bolivia           | Cotapata National<br>Park, Yungas, La Paz | 1<br>PUJ ID: lti36    | This work<br>GenBank: MG230217.1    |
|                     | Argentina         | Border Salta and<br>Tucumán               | 1<br>PUJ ID: lti15    | This work<br>GenBank: MG230226.1    |
|                     | Argentina         | Puerto Iguazú,<br>Misiones                | 1, 2<br>PUJ ID: lti16 | This work<br>GenBank: MG230229.1    |
|                     | Argentina         | Puerto Iguazú,<br>Misiones                | 1, 2<br>PUJ ID: lti17 | This work<br>GenBank: MG230230.1    |
|                     | Argentina         | San Pedro, Misiones                       | 1, 2<br>PUJ ID: lti18 | This work<br>GenBank: MG230231.1    |
|                     | Brazil            | Dois Vizinhos, Paraná                     | 1, 2<br>PUJ ID: lti83 | This work<br>GenBank: MG230233.1    |
|                     | Brazil            | Dois Vizinhos, Paraná                     | 1, 2<br>PUJ ID: lti84 | This work<br>GenBank: MG230234.1    |
|                     | Brazil            | Unknown origin                            | 1                     | GenBank (Johnson &<br>O'Brien 1997) |
|                     | Brazil            | Unknown origin                            | 1, 2                  | GenBank (Li et al. 2016)            |
| <i>L. colocola</i>  | Unknown<br>origin | Unknown origin<br><i>colocola</i>         | 1                     | GenBank (Johnson &<br>O'Brien 1997) |
|                     | Brazil            | Unknown origin<br><i>braccatus</i>        | 1, 2                  | GenBank (Li et al. 2016)            |
|                     | Brazil            | Unknown origin<br><i>braccatus</i>        | 1, 2                  | GenBank (Li et al. 2016)            |
| <i>L. geoffroyi</i> | Bolivia           | Puerto Suárez, Santa<br>Cruz              | 1, 2<br>PUJ ID: lge08 | This work<br>GenBank: MG230235.1    |
|                     | Argentina         | Unknown origin                            | 1                     | GenBank (Johnson &<br>O'Brien 1997) |
|                     | Argentina         | Unknown origin                            | 1, 2                  | GenBank (Li et al. 2016)            |
|                     | Argentina         | Unknown origin                            | 1, 2                  | GenBank (Li et al. 2016)            |
| <i>L. guigna</i>    | Chile             | Unknown origin                            | 1                     | GenBank (Johnson &<br>O'Brien 1997) |
|                     | Chile             | Unknown origin                            | 1, 2                  | GenBank (Li et al. 2016)            |
|                     | Chile             | Unknown origin                            | 1, 2                  | GenBank (Li et al. 2016)            |
|                     | Chile             | Unknown origin                            | 1                     | GenBank (Napolitano et al.<br>2008) |
|                     | Chile             | Unknown origin                            | 1                     | GenBank (Napolitano et al.<br>2008) |
| <i>L. jacobita</i>  | Bolivia           | La Paz                                    | 1, 2<br>PUJ ID: lja14 | This work<br>GenBank: MG230236.1    |
|                     | Bolivia           | Cochabamba                                | 1, 2<br>PUJ ID: lja21 | This work<br>GenBank: MG230237.1    |
|                     | Bolivia           | Unknown origin                            | 1, 2                  | GenBank (Li et al. 2016)            |

|                        |                   |                                                 |                        |                                     |
|------------------------|-------------------|-------------------------------------------------|------------------------|-------------------------------------|
|                        | Bolivia           | Unknown origin                                  | 1, 2                   | GenBank (Li et al. 2016)            |
| <i>L. pardalis</i>     | Colombia          | Guainía River,<br>Guainía                       | 1, 2<br>PUJ ID: lpa35  | This work<br>GenBank: MG230239.1    |
|                        | Colombia          | San Juan Socó,<br>Loretoyaku River,<br>Amazonas | 1, 2<br>PUJ ID: lpa67  | This work<br>GenBank: MG230240.1    |
|                        | Peru              | Floresta, Alto Uyacali                          | 1, 2<br>PUJ ID: lpa104 | This work<br>GenBank: MG230241.1    |
|                        | Brazil            | Humaitá, Madeira<br>River, Amazonas             | 1, 2<br>PUJ ID: lpa685 | This work<br>GenBank: MG230242.1    |
|                        | Brazil            | Negro River,<br>Amazonas                        | 1<br>PUJ ID: lpa77     | This work<br>GenBank: MG230238.1    |
|                        | Unknown<br>origin | Unknown origin                                  | 1, 2                   | GenBank (Li et al. 2016)            |
| <i>L. wiedii</i>       | Colombia          | Chigorodó, Antioquia                            | 1, 2<br>PUJ ID: lwi111 | This work<br>GenBank: MG230244.1    |
|                        | Colombia          | Leticia, Amazonas                               | 1, 2<br>PUJ ID: lwi95  | This work<br>GenBank: MG230245.1    |
|                        | Ecuador           | Tena, Napo                                      | 1, 2<br>PUJ ID: lwi118 | This work<br>GenBank: MG230243.1    |
| <i>H. yagouaroundi</i> | Guatemala         | Unknown origin                                  | 1                      | GenBank (Johnson & O'Brien<br>1997) |
|                        | Colombia          | Puerto Escondido,<br>Córdoba                    | 1, 2<br>PUJ ID: pya20  | This work<br>GenBank: MG230249.1    |
|                        | Ecuador           | Sarayacu, Pastaza                               | 1, 2<br>PUJ ID: pya77  | This work<br>GenBank: MG230248.1    |
|                        | Peru              | Tingo Maria, Huánuco                            | 1, 2<br>PUJ ID: pya22  | This work<br>GenBank: MG230250.1    |
|                        | Unknown<br>origin | Unknown origin                                  | 1, 2                   | GenBank (Li et al. 2016)            |
|                        | Unknown<br>origin | Unknown origin                                  | 1, 2                   | GenBank (Li et al. 2016)            |
| <i>F. catus</i>        | Colombia          | Bogotá                                          | 1, 2<br>PUJ ID: fca1   | This work<br>GenBank: MG230246.1    |
|                        | Colombia          | Bogotá                                          | 1, 2<br>PUJ ID: fca2   | This work<br>GenBank: MG230247.1    |
|                        | Colombia          | Bogotá                                          | 1<br>PUJ ID: fca3      | This work<br>GenBank: MG230251.1    |

**Table S2.** Mitochondrial and microsatellite primers employed in this work. **(A)** The Long-range amplification mitochondrial primers used. **(B)** Nuclear microsatellite primers used.

(A)

| Primer name      | Primer sequence (5' to 3')                       | Amplicon sizes (bp) | Genes contained in each amplicon                                                                                             |
|------------------|--------------------------------------------------|---------------------|------------------------------------------------------------------------------------------------------------------------------|
| LT1F<br><br>LT1R | ATGACTAATCAGCCCATGAT<br><br>AAGCATCCCACCTCAAACAT | 5,011               | <i>Control region, tRNA-Phe, 12s rRNA, tRNA-Val, 16s rRNA, tRNA-Leu, ND1</i>                                                 |
| LT2F<br><br>LT2R | AAGAAATATGTCTGACAAAA<br><br>TGATCTGCATCTATACTGA  | 4,015               | <i>tRNA-Ile, tRNA-Gln, tRNA-Met, ND2, tRNA-Trp, tRNA-Ala, tRNA-Asn, tRNA-Cys, tRNA-Tyr, COI, tRNA-Ser, tRNA-Asp and COII</i> |
| LT3F<br><br>LT3R | CATTAAGAAGCTAAATAAGC<br><br>GTGCAACTCCAAATAAAAGT | 4,050               | <i>tRNA-Lys, ATP8, ATP6, COIII, tRNA-Gly, ND3, tRNA-Arg, ND4L, ND4, tRNA-His, tRNA-Ser and tRNA-Leu</i>                      |
| LT4F<br><br>LT4R | TAAAAGTAATAAACCTATTT<br><br>TGGGACATCTCGATGGACTA | 3,680               | <i>ND5, ND6, tRNA-Glu, Cyt-b, tRNA-Thr and</i>                                                                               |

|  |  |  |                 |
|--|--|--|-----------------|
|  |  |  | <i>tRNA-Pro</i> |
|--|--|--|-----------------|

(B)

*Fca08*: ACTGTAAATTTCTGAGCTGGCC

TGACAGACTGTTCTGGGTATGG

*Fca43*: GAGCCACCCTAGCACATATAACC

AGACGGGATTGCATGAAAAG

*Fca45*: TGAAGAAAAGAATCAGGCTGTG

GTATGAGCATCTCTGTGTTCGTG

*Fca96*: CACGCCAAACTCTATGCTGA

CAATGTGCCGTCCAAGAAC

*Fca126*: GCCCCTGATACCCTGAATG

CTATCCTTGCTGGCTGAAGG

*Fca225*: CTGTCTCCCTCCTGTTCTG

TACCCACAGAACCTTCCTGC
